# Supplementary material for: Sex-specific dominance reversal of genetic variation for fitness
Source: PubMed Central journal article supplement (PMC6303075; doi:10.1371/journal.pbio.2006810), 2018-12-11
Supplement: pbio.2006810.s008.pdf [file pbio.2006810.s008.pdf]

S1 Table.

|                        | Effect                     | Symbol    | VarP  | L. 95% C.I. | U. 95% C.I. | % of Total explained | MIP  |
|------------------------|----------------------------|-----------|-------|-------------|-------------|----------------------|------|
| Overall                | Sex                        | $S$       | 0.001 | -0.0002     | 0.0032      | 0.31                 | 0.70 |
|                        | Inbreeding                 | $\beta$   | 0.147 | 0.1282      | 0.1652      | 37.99                | 0.72 |
|                        | Sex $\times$ inbreeding    | $\beta_S$ | 0.011 | 0.0053      | 0.0167      | 2.86                 | 0.71 |
|                        | Block                      | $x$       | 0.000 | 0.0000      | 0.0000      | 0.00                 | 1.00 |
| Strain-/cross-specific | Additive                   | $a$       | 0.015 | 0.0052      | 0.0249      | 3.88                 | 0.70 |
|                        | Sex $\times$ additive      | $a_S$     | 0.017 | 0.0083      | 0.0254      | 4.34                 | 0.67 |
|                        | Parental eff.              | $m$       | 0.005 | 0.0012      | 0.0096      | 1.34                 | 0.65 |
|                        | Sex $\times$ parental eff. | $m_S$     | 0.005 | 0.0016      | 0.0094      | 1.35                 | 0.09 |
|                        | Dominance                  | $b$       | 0.077 | 0.0616      | 0.0923      | 19.86                | 0.84 |
|                        | Sex $\times$ dominance     | $b_S$     | 0.020 | 0.0123      | 0.0288      | 5.27                 | 0.88 |
|                        | Epistasis                  | $v$       | 0.028 | 0.0190      | 0.0368      | 7.19                 | 0.88 |
|                        | Sex $\times$ epistasis     | $v_S$     | 0.020 | 0.0129      | 0.0274      | 5.12                 | 0.79 |
|                        | Asymm. epistasis           | $w$       | 0.022 | 0.0154      | 0.0292      | 5.73                 | 0.87 |
|                        | Sex $\times$ asymm. epi.   | $w_S$     | 0.018 | 0.0123      | 0.0247      | 4.76                 | 0.65 |
|                        | Total explained            |           | 0.386 | 0.3623      | 0.4090      |                      |      |
|                        | Total unexplained          |           | 0.614 | 0.5910      | 0.6377      |                      |      |
