# Supplementary material for: Sex-specific dominance reversal of genetic variation for fitness
Source: PubMed Central journal article supplement (PMC6303075; doi:10.1371/journal.pbio.2006810), 2018-12-11
Supplement: pbio.2006810.s009.pdf [file pbio.2006810.s009.pdf]

S2 Table.

|                        | Effect            | Symbol  | Female |             |             |                      | Male  |             |             |                      |
|------------------------|-------------------|---------|--------|-------------|-------------|----------------------|-------|-------------|-------------|----------------------|
|                        |                   |         | VarP   | L. 95% C.I. | U. 95% C.I. | % of Total explained | VarP  | L. 95% C.I. | U. 95% C.I. | % of Total explained |
| Over-all               | Inbreeding        | $\beta$ | 0.201  | 0.1735      | 0.2281      | 37.83                | 0.154 | 0.1279      | 0.1799      | 44.61                |
|                        | Block             | $x$     | 0.000  | 0.0000      | 0.0000      | 0.00                 | 0.000 | 0.0000      | 0.0000      | 0.00                 |
| Strain-/cross-specific | Additive          | $a$     | 0.049  | 0.0252      | 0.0744      | 9.24                 | 0.028 | 0.0132      | 0.0435      | 8.14                 |
|                        | Parental eff.     | $m$     | 0.011  | 0.0021      | 0.0197      | 1.99                 | 0.010 | 0.0036      | 0.0180      | 2.91                 |
|                        | Dominance         | $b$     | 0.142  | 0.1154      | 0.1682      | 26.66                | 0.090 | 0.0681      | 0.1129      | 26.09                |
|                        | Epistasis         | $v$     | 0.071  | 0.0499      | 0.0913      | 13.29                | 0.034 | 0.0215      | 0.0480      | 9.91                 |
|                        | Asymm. epistasis  | $w$     | 0.058  | 0.0430      | 0.0751      | 10.99                | 0.029 | 0.0184      | 0.0397      | 8.34                 |
|                        | Total explained   |         | 0.531  | 0.5013      | 0.5623      |                      | 0.345 | 0.3125      | 0.3794      |                      |
|                        | Total unexplained |         | 0.469  | 0.4377      | 0.4987      |                      | 0.655 | 0.6206      | 0.6875      |                      |
