# Supplementary material for: Sex-specific dominance reversal of genetic variation for fitness
Source: PubMed Central journal article supplement (PMC6303075; doi:10.1371/journal.pbio.2006810), 2018-12-11
Supplement: pbio.2006810.s010.pdf [file pbio.2006810.s010.pdf]

S3 Table.

|                            | Effect           | Symbol        | Female     |          | Male       |          |
|----------------------------|------------------|---------------|------------|----------|------------|----------|
|                            |                  |               | F          | <i>P</i> | F          | <i>P</i> |
| Over-<br>all               | Inbreeding       | $b_1$         | 22.02      | <0.001   | 26.00      | <0.001   |
|                            | Block            | $x$           | 72.17      | <0.001   | 43.79      | <0.001   |
|                            |                  |               | $\sigma^2$ | s.e.     | $\sigma^2$ | s.e.     |
| Strain-/cross-<br>specific | Additive         | $a$           | 0.0026     | 0.0051   | 0.0058     | 0.0119   |
|                            | Parental eff.    | $c$           | -0.0003    | 0.0003   | 0.0003     | 0.0009   |
|                            | Dominance        | $b_2$         | 0.0165     | 0.0064   | 0.0384     | 0.0149   |
|                            | Epistasis        | $b_3$         | 0.0012     | 0.0008   | 0.0029     | 0.0019   |
|                            | Asymm. epistasis | $d$           | 0.0024     | 0.0011   | -0.0060    | 0.0024   |
|                            | Error            | $\varepsilon$ | 0.0300     | 0.0012   | 0.1540     | 0.0057   |
